# Supplementary material for: Colorectal cancer patients with <i>CASK</i> promotor heterogeneous and homogeneous methylation display different prognosis
Source: publisher site journal article supplement (doi:10.18632/aging.103928), 2020-10-26
Supplement: Supplementary file [file aging-v12i20-103928-supplementary-material-SD1.pdf]

**SUPPLEMENTARY FIGURES**

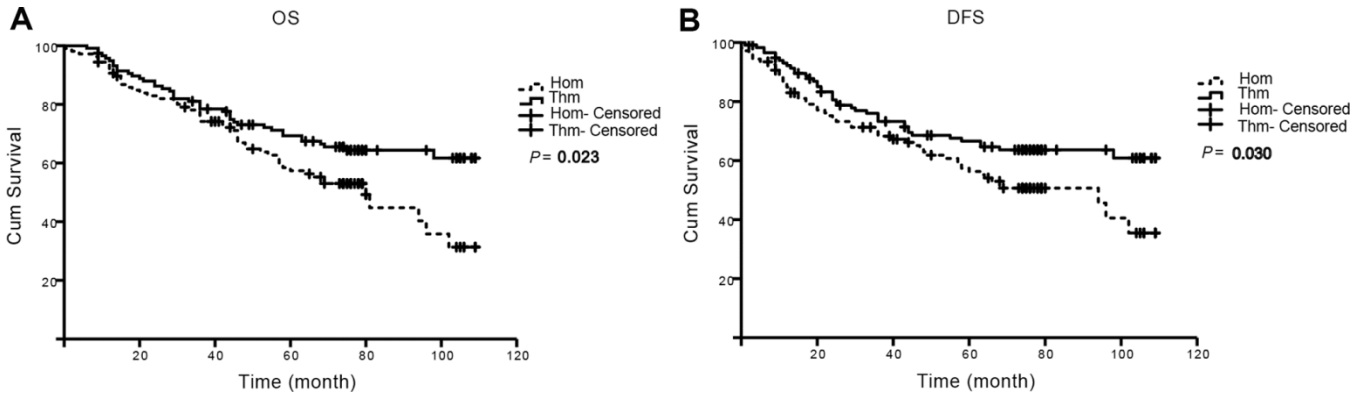

**Supplementary Figure 1. Kaplan-Meier curves for survival comparisons of total heterogeneous methylation (Thm) and homogeneous methylation (Hom) group. (A) Kaplan-Meier curves for overall survival; (B) Kaplan-Meier curves for disease-free survival.**

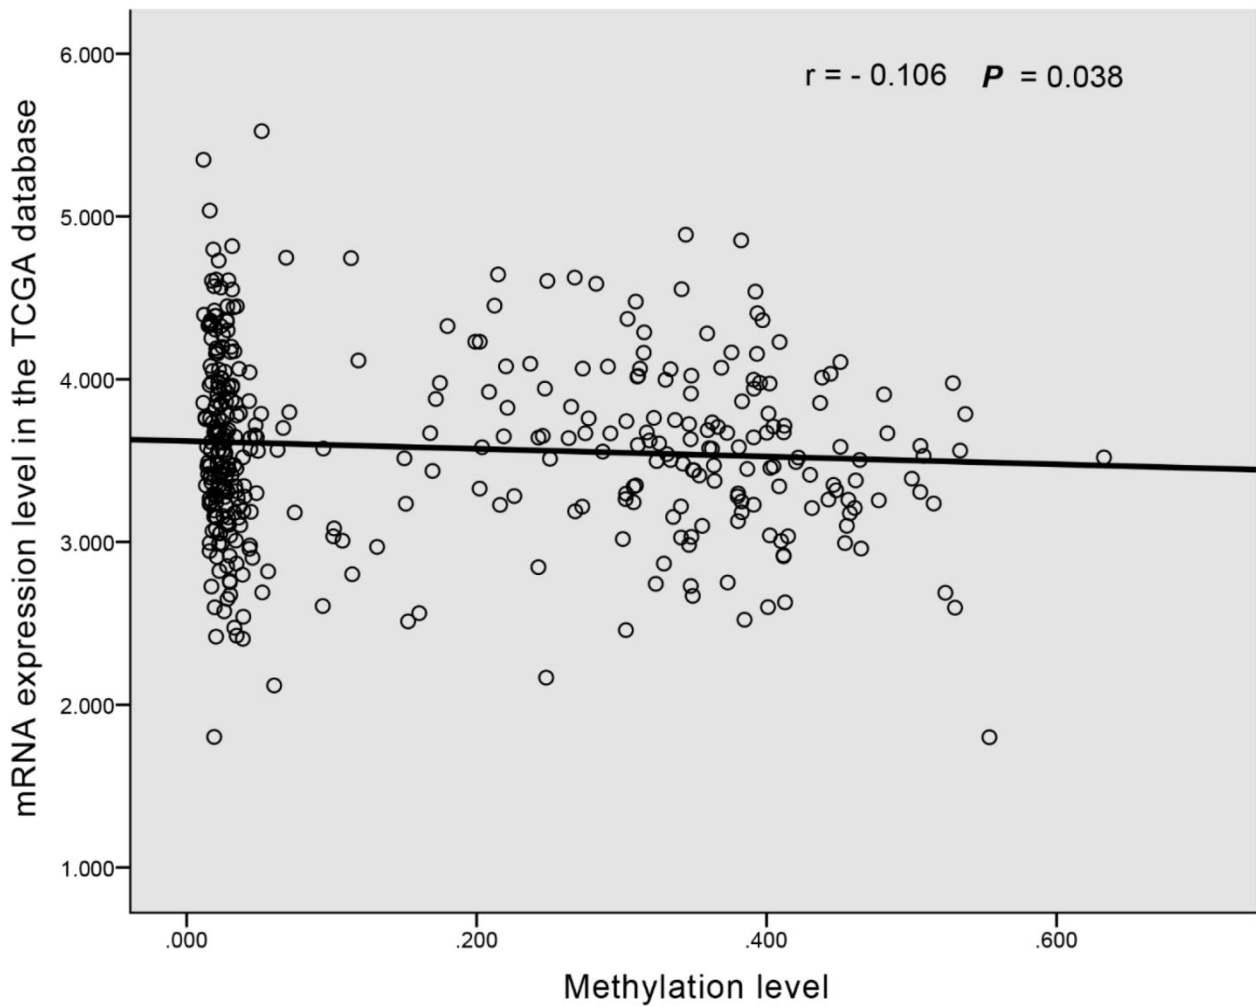

**Supplementary Figure 2. Methylation level of *CASK* (cg12614178) and mRNA expression level in the TCGA database.**

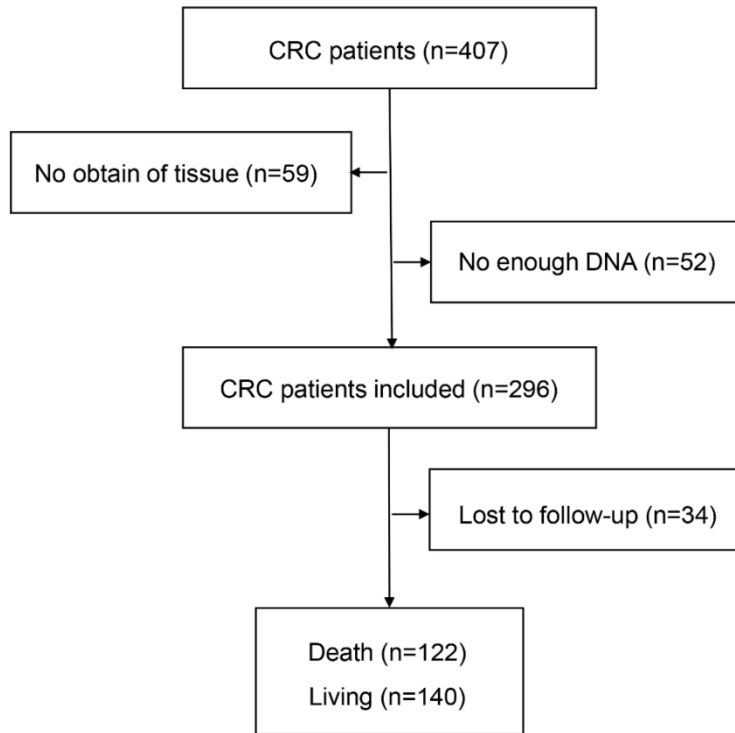

**Supplementary Figure 3. Flow chart of participant selection in the cohort study.**

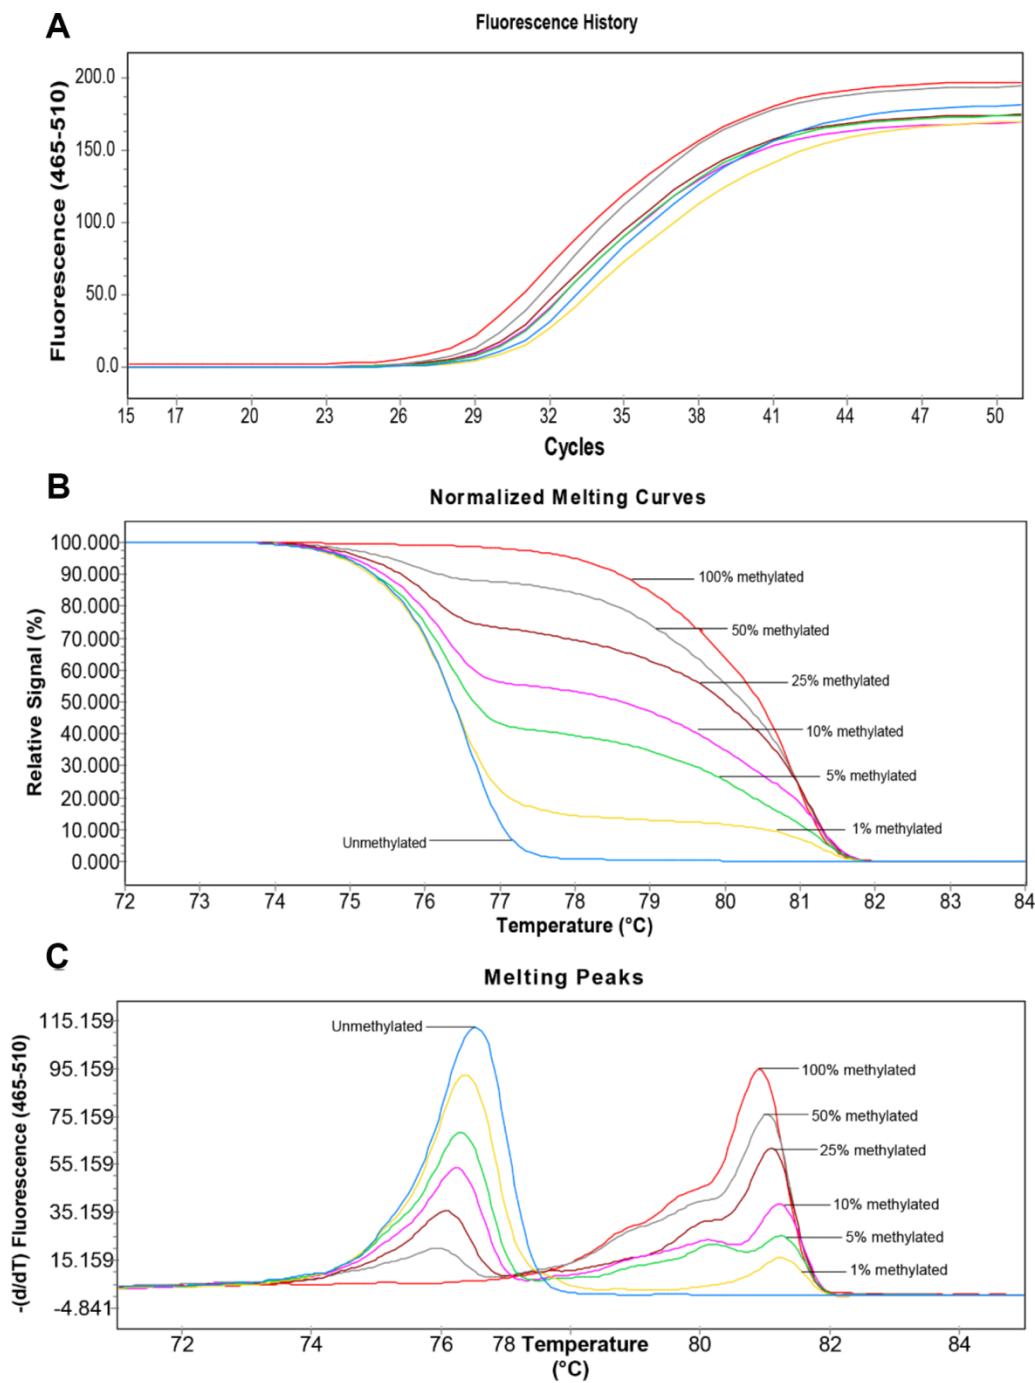

**Supplementary Figure 4. High-resolution melting profiles for CASK promoter methylation standards. (A)** Amplification of methylation standard; **(B)** normalized melting curves; **(C)** melting peaks. Standards: 100%, 50%, 25%, 10%, 5%, 1%, 0% methylated DNA.
