# Supplementary material for: Colorectal cancer patients with <i>CASK</i> promotor heterogeneous and homogeneous methylation display different prognosis
Source: publisher site journal article supplement (doi:10.18632/aging.103928), 2020-10-26
Supplement: Supplementary file [file aging-v12i20-103928-supplementary-material-SD2.pdf]

## SUPPLEMENTARY TABLES

**Supplementary Table 1. Frequencies of different methylation status in CRC patients.**

| Methylation status | Tumor tissue (No=296), No (%) | Normal tissue adjacent tumor (No=255), No (%) | <i>P</i> <sup>†</sup> |
|--------------------|-------------------------------|-----------------------------------------------|-----------------------|
| Unm                | 72 (24.3%)                    | 82 (32.2%)                                    |                       |
| Tpm                | 224 (75.7%)                   | 173 (67.8%)                                   | <b>0.041</b>          |
| Thm                | 117 (52.2%)                   | 108 (62.4%)                                   |                       |
| Hom                | 107 (47.8%)                   | 65 (37.6%)                                    | <b>0.042</b>          |

<sup>†</sup> P value was calculated using Pearson's Chi-square test for comparing survival rates between two groups.

**Supplementary Table 2. Distribution of the characteristics of CRC patients according to different methylation status (Hom vs Thm).**

| Baseline characteristics    | Total (No=224) | Hom (No=107), No (%) | Thm (No=117), No (%) | <i>P</i> <sup>†</sup> |
|-----------------------------|----------------|----------------------|----------------------|-----------------------|
| Age                         |                |                      |                      | 0.514                 |
| < 50                        | 46             | 20 (18.7%)           | 26 (22.2%)           |                       |
| ≥ 50                        | 178            | 87 (81.3%)           | 91 (77.8%)           |                       |
| Gender                      |                |                      |                      | < <b>0.001</b>        |
| Male                        | 103            | 20 (18.7%)           | 83 (70.9%)           |                       |
| Female                      | 121            | 87 (81.3%)           | 34 (29.1%)           |                       |
| Primary site                |                |                      |                      | 0.903                 |
| Colon                       | 87             | 42 (39.3%)           | 45 (38.5%)           |                       |
| Rectum                      | 137            | 65 (60.7%)           | 72 (61.5%)           |                       |
| Dukes staging               |                |                      |                      | 0.158                 |
| A/B                         | 123            | 64 (59.8%)           | 59 (50.4%)           |                       |
| C/D                         | 101            | 43 (40.2%)           | 58 (49.6%)           |                       |
| TNM staging                 |                |                      |                      | 0.158                 |
| I/II                        | 123            | 64 (59.8%)           | 59 (50.4%)           |                       |
| III/IV                      | 101            | 43 (40.2%)           | 58 (49.6%)           |                       |
| Tumor invasion              |                |                      |                      | <b>0.002</b>          |
| T1-T3                       | 116            | 44 (41.1%)           | 72 (61.5%)           |                       |
| T4                          | 108            | 63 (58.9%)           | 45 (38.5%)           |                       |
| Lymph node metastasis       |                |                      |                      | 0.242                 |
| N0                          | 127            | 65 (60.7%)           | 62 (53.0%)           |                       |
| N1/N2                       | 97             | 42 (39.3%)           | 55 (47.0%)           |                       |
| Distant metastasis          |                |                      |                      | 0.437                 |
| M0                          | 213            | 103 (96.3%)          | 110 (94.0%)          |                       |
| M1                          | 11             | 4 (3.7%)             | 7 (6.0%)             |                       |
| Histological grade          |                |                      |                      | 0.641                 |
| G1/G2                       | 191            | 90 (84.1%)           | 101 (86.3%)          |                       |
| G3/G4                       | 33             | 17 (15.9%)           | 16 (13.7%)           |                       |
| Histological type           |                |                      |                      | 0.142                 |
| Adenocarcinoma              | 168            | 85 (79.4%)           | 83 (70.9%)           |                       |
| Other types                 | 56             | 22 (20.6%)           | 34 (29.1%)           |                       |
| Pathological classification |                |                      |                      | 0.888                 |
| Protuberant                 | 156            | 75 (70.1%)           | 81 (69.2%)           |                       |

|                     |     |            |            |       |
|---------------------|-----|------------|------------|-------|
| Other types         | 68  | 32 (29.9%) | 36 (30.8%) | 0.263 |
| Preoperative CEA    |     |            |            |       |
| 0-5ng/ml            | 96  | 50 (46.7%) | 46 (39.3%) | 0.384 |
| ≥ 5ng/ml            | 128 | 57 (53.3%) | 71 (60.7%) |       |
| Preoperative CA19-9 |     |            |            |       |
| 0-37U/ml            | 159 | 73 (68.2%) | 86 (73.5%) | 0.384 |
| ≥ 37U/ml            | 65  | 34 (31.8%) | 31 (26.5%) |       |

<sup>†</sup> P value was calculated using Pearson's Chi-square test.

**Supplementary Table 3. The overall survival rates of CRC patients according to different methylation status.**

| Methylation status | No (%)      | 1year            |                | 3years           |                | 5years           |                | 8years           |                |
|--------------------|-------------|------------------|----------------|------------------|----------------|------------------|----------------|------------------|----------------|
|                    |             | SR (96%CI)       | P <sup>†</sup> | SR (96%CI)       | P <sup>†</sup> | SR (96%CI)       | P <sup>†</sup> | SR (96%CI)       | P <sup>†</sup> |
| Unm                | 72 (24.3%)  | 0.92 (0.88-0.96) |                | 0.83 (0.73-0.93) |                | 0.71 (0.59-0.83) |                | 0.48 (0.34-0.62) |                |
| Tpm                | 224 (75.7%) | 0.92 (0.88-0.96) | 0.620          | 0.73 (0.67-0.79) | 0.482          | 0.63 (0.51-0.75) | 0.372          | 0.46 (0.38-0.54) | 0.881          |
| Hom                | 107 (47.8%) | 0.89 (0.85-0.93) |                | 0.71 (0.61-0.81) |                | 0.57 (0.47-0.67) |                | 0.27 (0.09-0.45) |                |
| Thm                | 117 (52.2%) | 0.94 (0.88-1.00) | 0.321          | 0.76 (0.68-0.84) | 0.527          | 0.69 (0.61-0.77) | 0.071          | 0.56 (0.46-0.66) | <b>0.023</b>   |

<sup>†</sup> P value was calculated using life table.

**Supplementary Table 4. Association between CASK methylation status and survival of patients with CRC.**

| Methylation status | No  | Multivariate Cox <sup>†</sup> (OS) |                | Multivariate Cox <sup>†</sup> (DFS) |                |
|--------------------|-----|------------------------------------|----------------|-------------------------------------|----------------|
|                    |     | HR (95% CI)                        | P <sup>‡</sup> | HR (95% CI)                         | P <sup>‡</sup> |
| Unm                | 72  | 1                                  |                | 1                                   |                |
| Tpm                | 224 | 0.970 (0.561-1.678)                | 0.914          | 0.916 (0.530-1.582)                 | 0.753          |
| Hom                | 107 | 2.473 (1.136-5.382)                | <b>0.022</b>   | 2.096 (0.969-4.535)                 | 0.060          |
| Thm                | 117 | 0.826 (0.451-1.513)                | 0.536          | 0.801 (0.439-1.461)                 | 0.469          |

<sup>†</sup> Adjusted factors: age, gender, primary site, TNM staging, histological grade, pathological classification, preoperative CA19-9, and postoperative radiotherapy.

<sup>‡</sup> P value was calculated using Cox regression model.

**Supplementary Table 5. Associations between *CASK* methylation status, clinicopathologic characteristics and CRC survival in univariate Cox regression models.**

| Baseline characteristics    | Univariate Cox (OS)  |                       | Univariate Cox (DFS) |                       |
|-----------------------------|----------------------|-----------------------|----------------------|-----------------------|
|                             | HR (95% CI)          | <i>P</i> <sup>†</sup> | HR (95% CI)          | <i>P</i> <sup>†</sup> |
| Age                         |                      |                       |                      |                       |
| < 50                        | 1                    |                       | 1                    |                       |
| ≥ 50                        | 0.774 (0.513-1.169)  | 0.223                 | 0.732 (0.484-1.106)  | 0.138                 |
| Gender                      |                      |                       |                      |                       |
| Male                        | 1                    |                       | 1                    |                       |
| Female                      | 1.140 (0.797-1.632)  | 0.472                 | 1.138 (0.795-1.628)  | 0.480                 |
| Primary site                |                      |                       |                      |                       |
| Colon                       | 1                    |                       | 1                    |                       |
| Rectum                      | 1.145 (0.784-1.671)  | 0.484                 | 1.131 (0.775-1.651)  | 0.524                 |
| Dukes staging               |                      |                       |                      |                       |
| A/B                         | 1                    |                       | 1                    |                       |
| C/D                         | 2.702 (1.870-3.906)  | < <b>0.001</b>        | 2.628 (1.818-3.799)  | < <b>0.001</b>        |
| TNM staging                 |                      |                       |                      |                       |
| I/II                        | 1                    |                       | 1                    |                       |
| III/IV                      | 2.855 (1.967-4.145)  | < <b>0.001</b>        | 2.818 (1.941-4.093)  | < <b>0.001</b>        |
| Tumor invasion              |                      |                       |                      |                       |
| T1-T3                       | 1                    |                       | 1                    |                       |
| T4                          | 1.589 (1.099-2.297)  | <b>0.014</b>          | 1.534 (1.062-2.215)  | <b>0.022</b>          |
| Lymph node metastasis       |                      |                       |                      |                       |
| N0                          | 1                    |                       | 1                    |                       |
| N1/N2                       | 2.723 (1.882-3.941)  | < <b>0.001</b>        | 2.700 (1.866-3.908)  | < <b>0.001</b>        |
| Distant metastasis          |                      |                       |                      |                       |
| M0                          | 1                    |                       | 1                    |                       |
| M1                          | 5.812 (3.088-10.938) | < <b>0.001</b>        | 4.550 (2.427-8.533)  | < <b>0.001</b>        |
| Histological grade          |                      |                       |                      |                       |
| G1/G2                       | 1                    |                       | 1                    |                       |
| G3/G4                       | 1.870 (1.191-2.935)  | <b>0.007</b>          | 1.933 (1.231-3.036)  | <b>0.004</b>          |
| Histological type           |                      |                       |                      |                       |
| Adenocarcinoma              | 1                    |                       | 1                    |                       |
| Other types                 | 0.876 (0.560-1.369)  | 0.561                 | 0.851 (0.544-1.330)  | 0.478                 |
| Pathological classification |                      |                       |                      |                       |
| Protuberant                 | 1                    |                       | 1                    |                       |
| Other types                 | 2.006 (1.384-2.908)  | < <b>0.001</b>        | 2.017 (1.392-2.933)  | < <b>0.001</b>        |
| Preoperative CEA            |                      |                       |                      |                       |
| 0-5ng/ml                    | 1                    |                       | 1                    |                       |
| ≥ 5ng/ml                    | 1.973 (1.336-2.913)  | < <b>0.001</b>        | 2.075 (1.405-3.-64)  | < <b>0.001</b>        |
| Preoperative CA19-9         |                      |                       |                      |                       |
| 0-37U/ml                    | 1                    |                       | 1                    |                       |
| ≥ 37U/ml                    | 5.649 (3.925-8.132)  | < <b>0.001</b>        | 5.815 (4.040-8.371)  | < <b>0.001</b>        |
| Postoperative chemotherapy  |                      |                       |                      |                       |
| No                          | 1                    |                       | 1                    |                       |
| Yes                         | 0.997 (0.698-1.425)  | 0.988                 | 1.160 (0.811-1.657)  | 0.416                 |

|                            |                     |              |                     |              |
|----------------------------|---------------------|--------------|---------------------|--------------|
| Postoperative radiotherapy |                     |              |                     |              |
| No                         | 1                   |              | 1                   |              |
| Yes                        | 2.517 (1.308-4.843) | <b>0.006</b> | 2.860 (1.483-5.518) | <b>0.002</b> |
| Postoperative biotherapy   |                     |              |                     |              |
| No                         | 1                   |              | 1                   |              |
| Yes                        | 0.607 (0.347-1.061) | 0.080        | 0.661 (0.378-1.157) | 0.147        |
| Methylation status         |                     |              |                     |              |
| Unm                        | 1                   |              | 1                   |              |
| Tpm                        | 1.054 (0.695-1.600) | 0.803        | 1.046 (0.689-1.587) | 0.833        |
| Thm                        | 1                   |              | 1                   |              |
| Hom                        | 1.603 (1.062-2.419) | <b>0.025</b> | 1.567 (1.039-2.364) | <b>0.032</b> |

<sup>†</sup> P value was calculated using Cox regression model.

**Supplementary Table 6. Association between CASK methylation status and survival of patients with CRC.**

| Methylation status | No      | Multivariate Cox <sup>†</sup> (OS) |                | Multivariate Cox <sup>†</sup> (DFS) |                |
|--------------------|---------|------------------------------------|----------------|-------------------------------------|----------------|
|                    |         | HR (95% CI)                        | P <sup>‡</sup> | HR (95% CI)                         | P <sup>‡</sup> |
| Hom/Thm            | 107/117 | 2.501 (1.383-4.525)                | <b>0.002</b>   | 2.495 (1.394-4.464)                 | <b>0.002</b>   |
| Hom/Hem1           | 107/82  | 2.680 (1.241-5.787)                | <b>0.012</b>   | 2.684 (1.252-5.756)                 | <b>0.011</b>   |
| Hom/Hem1-1         | 107/57  | 3.473 (1.461-8.253)                | <b>0.005</b>   | 3.310 (1.408-3.310)                 | <b>0.006</b>   |
| Hom/Hem1-2         | 107/25  | 1.827 (0.663-5.037)                | 0.244          | 2.002 (0.726-5.524)                 | 0.180          |
| Hom/Hem2           | 107/35  | 3.452 (1.341-8.889)                | <b>0.010</b>   | 2.907 (1.161-7.283)                 | <b>0.023</b>   |
| Hom/Hem2-1         | 107/27  | 4.836 (1.601-14.608)               | <b>0.005</b>   | 3.839 (1.299-11.339)                | <b>0.015</b>   |
| Hom/Hem2-2         | 107/8   | 0.833 (0.175-3.957)                | 0.818          | 0.984 (0.276-4.637)                 | 0.984          |

<sup>†</sup> Adjusted factors: age, gender, primary site, TNM staging, histological grade, pathological classification, preoperative CA19-9, and postoperative radiotherapy.

<sup>‡</sup> P value was calculated using Cox regression model.

**Supplementary Table 7. Association between different methylation status and CRC prognosis in validation dataset with different cutoff value (Hom vs Thm).**

| Cutoff value | Hom, No | Thm, No | Univariate Cox (OS) |                | Multivariate Cox <sup>†</sup> (OS) |                |
|--------------|---------|---------|---------------------|----------------|------------------------------------|----------------|
|              |         |         | HR (95% CI)         | P <sup>‡</sup> | HR (95% CI)                        | P <sup>‡</sup> |
| Best cutoff  | 210     | 169     | 1.512 (0.976-2.342) | 0.064          | 1.700 (0.819-3.532)                | 0.155          |
| q25          | 94      | 285     | 1.196 (0.746-1.918) | 0.458          | 0.977 (0.567-1.684)                | 0.933          |
| q50          | 189     | 190     | 1.348 (0.880-2.065) | 0.169          | 1.219 (0.630-2.358)                | 0.556          |
| q75          | 284     | 95      | 1.171 (0.715-1.916) | 0.532          | 1.009 (0.519-1.959)                | 0.980          |

<sup>†</sup> Adjusted factors: age, gender, primary site, and histological type.

<sup>‡</sup> P value was calculated using Cox regression model.

**Supplementary Table 8. Subgroup analysis of associations between different methylation status and the CRC prognosis in validation dataset (Hom vs Thm).**

| Subgroup   | Hom, No | Thm, No | Univariate Cox (OS)  |                | Multivariate Cox <sup>†</sup> (OS) |                |
|------------|---------|---------|----------------------|----------------|------------------------------------|----------------|
|            |         |         | HR (95% CI)          | P <sup>‡</sup> | HR (95% CI)                        | P <sup>‡</sup> |
| Gender     |         |         |                      |                |                                    |                |
| Male       | 187     | 19      | 2.681 (0.651-11.044) | 0.172          | 2.591 (0.624-10.751)               | 0.190          |
| Female     | 23      | 150     | 1.162 (0.408-3.315)  | 0.778          | 1.194 (0.417-3.420)                | 0.742          |
| Age        |         |         |                      |                |                                    |                |
| < 50       | 30      | 27      | 0.886 (0.195-4.020)  | 0.875          | 0.433 (0.043-4.406)                | 0.480          |
| ≥ 50       | 180     | 142     | 1.513 (0.956-2.395)  | 0.077          | 2.038 (0.964-4.306)                | 0.062          |
| Tumor site |         |         |                      |                |                                    |                |
| Rectal     | 54      | 40      | 0.833 (0.313-2.216)  | 0.715          | 1.657 (0.343-8.008)                | 0.530          |
| Colon      | 156     | 129     | 1.777 (1.080-2.921)  | <b>0.024</b>   | 1.827 (0.788-4.233)                | 0.160          |

<sup>†</sup> Adjusted factors: age, gender, primary site, and histological type.

<sup>‡</sup> P value was calculated using Cox regression model.

**Supplementary Table 9. Primer sequence, reaction mixture, and cycling protocol.**

| Gene | Direction | Primer sequence                     | Reaction mixture (10μL)                                                                                                               | Cycling protocol                                                                                                                                                                                                                                       |
|------|-----------|-------------------------------------|---------------------------------------------------------------------------------------------------------------------------------------|--------------------------------------------------------------------------------------------------------------------------------------------------------------------------------------------------------------------------------------------------------|
| CASK | Forward   | 5'-<br>GGGAGGAGGAGAAAGAGGA-3'       | 5μL 2×LightCycler 480<br>High-Resolution<br>Melting Master Mix<br>1.2μL MgCl <sub>2</sub> (25 mM)<br>0.25μL of each primer (10<br>Mm) | <b>MS-HRM:</b><br><b>Initial denaturation:</b> 95°C for 10 min<br><b>Cycling:</b> 55x (95°C for 10s, 57°C for 40s,<br>72°C for 30s)<br><b>Final extension:</b> 72°C for 10 min<br><b>HRM:</b> 95°C for 1 min, 40°C for 1 min,<br>69°C-95°C (0.01°C/s)  |
|      | Reverse   | 5'-<br>AACCGCGACAAAACCATAAAA-<br>3' | 2.7μL PCR grade water<br>0.6μL bisulfite-modified<br>template DNA (theoretical<br>concentration 25 ng/μL)                             | <b>dMS-HRM:</b><br><b>Initial denaturation:</b> 95°C for 10 min<br><b>Cycling:</b> 55x (95°C for 10s, 56°C for 40s,<br>72°C for 30s)<br><b>Final extension:</b> 72°C for 10 min<br><b>HRM:</b> 95°C for 1 min, 40°C for 1 min,<br>69°C-95°C (0.01°C/s) |

**Supplementary Table 10. Results of methylation detection at different time points.**

| <b>Sample ID</b> | <b>First time</b> | <b>Second time</b> | <b><math>\kappa</math> value</b> | <b><math>P^{\dagger}</math></b> |
|------------------|-------------------|--------------------|----------------------------------|---------------------------------|
| TN100            | Hem 2-1           | Hem 2-1            | 0.943                            | < 0.001                         |
| TN40             | Hem 1-1           | Hem 1-1            |                                  |                                 |
| 23               | Hom               | Hom                |                                  |                                 |
| 100              | Hom               | Hom                |                                  |                                 |
| TN23             | Hem 2-1           | Hem 2-1            |                                  |                                 |
| TN25             | Hem 1-1           | Hem 1-1            |                                  |                                 |
| TN94             | Unm               | Unm                |                                  |                                 |
| TN84             | Unm               | Unm                |                                  |                                 |
| TN107            | Unm               | Unm                |                                  |                                 |
| TN86             | Hem 1-1           | Hem 1-1            |                                  |                                 |
| TN108            | Hem 2-1           | Hem 2-1            |                                  |                                 |
| TN112            | Hem 1-2           | Hem 1-2            |                                  |                                 |
| TN151            | Unm               | Unm                |                                  |                                 |
| TN165            | Unm               | Unm                |                                  |                                 |
| TN167            | Unm               | Unm                |                                  |                                 |
| TN126            | Hem 2-1           | Hem 2-1            |                                  |                                 |
| TN120            | Hem 2-1           | Hem 2-1            |                                  |                                 |
| TN127            | Hom               | Hom                |                                  |                                 |
| TN149            | Hem 2-1           | Hem 2-1            |                                  |                                 |
| TN172            | Hom               | Hom                |                                  |                                 |
| TN07365          | Unm               | Unm                |                                  |                                 |
| TN07366          | Hom               | Hom                |                                  |                                 |
| TN07013          | Hem 1-2           | Hem 1-2            |                                  |                                 |
| TN07029          | Hom               | Hom                |                                  |                                 |
| TN189            | Hem 2-1           | Hem 2-1            |                                  |                                 |
| TN07367          | Unm               | Unm                |                                  |                                 |
| TN07031          | Hom               | Hom                |                                  |                                 |
| TN192            | Hem 2-1           | Hem 2-1            |                                  |                                 |
| TN96             | Unm               | Unm                |                                  |                                 |
| TN182            | Hem 2-1           | Hem 2-1            |                                  |                                 |
| TN07354          | Unm               | Hem 1-1            |                                  |                                 |
| TN07004          | Hem 1-1           | Hem 1-1            |                                  |                                 |
| TN07019          | Unm               | Unm                |                                  |                                 |
| TN07355          | Hom               | Hom                |                                  |                                 |
| TN07037          | Unm               | Unm                |                                  |                                 |
| TN07067          | Unm               | Unm                |                                  |                                 |
| TN07038          | Unm               | Unm                |                                  |                                 |
| 07104            | Hem 1-1           | Hem 1-1            |                                  |                                 |
| 07107            | Unm               | Hom                |                                  |                                 |
| TN07198          | Hem 1-2           | Hem 1-2            |                                  |                                 |
| TN07183          | Hem 2-1           | Hem 2-1            |                                  |                                 |
| TN07221          | Hem 2-1           | Hem 2-1            |                                  |                                 |
| TN07355          | Hom               | Hom                |                                  |                                 |
| TN07382          | Hom               | Hom                |                                  |                                 |

|         |     |     |
|---------|-----|-----|
| TN07389 | Unm | Unm |
| TN07381 | Unm | Unm |
| TN07386 | Unm | Unm |

---
